# Supplementary material for: An interpretable deep learning model for detecting BRCA pathogenic variants of breast cancer from hematoxylin and eosin-stained pathological images
Source: PeerJ. 2024 Oct 28;12:e18098. doi: 10.7717/peerj.18098 (PMC11526788; doi:10.7717/peerj.18098)
Supplement: Supplemental Information 1 [file peerj-12-18098-s001.xls]

## Sheet: clinical dataset
Patients	subtype	stage	history	age	ER	PR	HER2
1	3	3	0	53	0	0	0
2	1	2	1	41	1	1	0
3	3	2	0	43	0	0	0
4	1	3	0	66	1	1	0
5	2	2	0	52	0	0	1
6	1	3	0	29	1	1	0
7	2	2	0	41	0	0	1
8	1	3	0	55	1	1	0
9	2	3	1	50	0	0	1
10	3	4	0	48	0	0	0
11	1	1	0	47	1	1	0
12	1	2	0	39	1	1	0
13	3	1	1	43	0	0	0
14	3	2	0	45	0	0	0
15	1	1	0	30	1	1	0
16	3	2	0	56	0	0	0
17	1	2	0	42	1	1	0
18	1	2	1	45	1	1	0
19	3	2	0	47	0	0	0
20	1	2	0	54	1	1	1
21	3	2	0	54	0	0	0
22	3	1	0	49	0	0	0
23	1	4	0	51	1	1	0
24	1	2	0	37	0	1	0
25	3	3	0	54	0	0	0
26	3	1	1	37	0	0	0
27	1	3	0	50	1	1	0
28	3	2	0	52	0	0	0
29	3	1	0	68	0	0	0
30	1	2	0	49	0	1	0
31	2	2	0	59	0	0	1
32	3	2	0	56	0	0	0
33	2	2	0	48	0	0	1
34	3	2	0	47	0	0	0
35	1	2	0	44	1	1	0
36	3	1	0	45	0	0	0
37	2	2	0	52	0	0	1
38	1	2	0	55	0	1	1
39	3	2	0	52	0	0	0
40	3	1	1	56	0	0	0
41	1	3	0	45	1	1	0
42	1	1	1	55	1	1	0
43	3	2	0	47	0	0	0
44	3	2	0	67	0	0	0
45	3	2	0	53	0	0	0
46	3	2	0	63	0	0	0
47	1	1	0	73	1	1	0
48	1	4	0	35	1	1	1
49	3	2	0	56	0	0	0
50	2	3	1	65	0	0	1
51	3	2	1	52	1	0	0
52	3	3	0	48	0	0	0
53	3	2	0	48	0	0	0
54	1	1	0	52	1	1	0
55	1	2	1	50	1	1	0
56	1	3	0	56	1	0	1
57	2	2	0	47	0	0	1
58	1	2	1	43	1	1	0
59	1	2	0	47	1	1	0
60	1	1	0	49	1	0	1
61	1	1	1	41	1	0	1
62	3	1	0	33	0	0	0
63	2	1	0	41	0	0	1
64	3	2	0	42	0	0	0
65	3	2	1	46	0	0	0
66	3	3	0	64	0	0	0
67	1	1	0	34	1	0	1
68	1	1	0	44	1	1	0
69	1	2	0	58	1	1	1
70	1	1	0	38	1	1	0
71	1	2	0	45	1	1	0
72	1	2	0	32	1	1	0
73	3	3	0	54	0	0	0
74	1	2	0	50	1	1	0
75	1	1	0	56	1	1	1
76	3	1	1	67	0	0	0
77	3	2	0	35	0	0	0
78	1	2	1	40	1	1	1
79	1	1	0	38	0	1	0
80	3	2	0	59	0	0	0
81	1	2	0	39	1	1	0
82	1	2	0	37	1	1	0
83	3	2	1	49	0	0	0
84	1	2	0	40	1	1	1
85	1	3	0	41	1	1	1
86	3	2	0	66	0	0	0
87	1	1	0	57	0	0	1
88	1	2	0	51	1	1	0
89	1	1	0	47	1	0	1
90	1	1	0	38	1	1	0
91	1	1	0	58	1	0	1
92	3	1	1	50	0	0	0
93	2	1	0	49	0	0	1
94	1	2	1	50	1	1	0
95	1	3	1	61	1	1	0
96	1	1	0	37	1	1	0
97	3	2	0	53	0	0	0
98	1	2	0	54	1	1	0
99	1	2	1	35	1	1	0
100	3	2	1	53	0	0	0
101	1	2	0	46	1	1	1
102	3	2	0	49	0	0	0
103	1	2	0	48	1	1	0
104	1	2	0	55	1	1	0
105	1	2	0	47	1	0	0
106	3	2	0	55	0	0	0
107	1	2	0	47	1	1	1
108	1	1	0	29	1	1	0
109	3	2	0	32	0	0	0
110	1	2	0	56	1	0	0
111	1	2	0	50	1	1	0
112	1	2	1	58	1	0	0
113	1	1	0	43	1	1	0
114	1	2	0	45	1	1	0
115	1	2	0	40	1	1	1
116	1	2	0	52	1	1	0
117	1	1	0	43	1	0	1
118	1	1	0	33	1	1	0
119	3	4	0	42	0	0	0
120	1	4	0	55	1	1	0
121	3	2	0	51	0	0	0
122	3	2	1	37	0	0	0
123	3	2	0	54	0	0	0
124	1	2	0	52	1	1	0
125	3	2	0	38	0	0	0
126	2	3	0	45	0	0	1
127	3	2	1	65	0	0	0
128	2	2	1	65	0	0	1
129	2	2	1	44	0	0	1
130	3	1	0	52	0	0	0
131	3	2	0	64	0	0	0
132	3	2	0	37	0	0	0
133	1	2	0	41	1	1	1
134	1	2	0	61	1	1	0
135	1	2	0	31	1	1	0
136	1	2	0	38	1	1	0
137	1	2	0	45	1	1	0
138	1	1	0	40	1	1	1
139	3	1	0	45	0	0	0
140	2	2	0	39	0	0	1
141	1	1	0	42	1	1	0
142	3	1	0	51	0	0	0
143	3	1	0	69	0	0	0
144	3	1	1	49	0	0	0
145	1	3	0	49	1	0	0
146	2	2	0	49	0	0	1
147	3	2	0	55	0	0	0
148	2	2	0	51	0	0	1
149	1	2	0	47	1	1	0
150	2	2	0	47	0	0	1
151	1	1	0	31	1	1	0
152	3	2	1	31	0	0	0

## Sheet: Sheet1
								53		41
								43		47
								66		39
								52		56
								29		54
								41		50
								55		52
								50		59
								48		45
								43		55
								45		65
								30		47
								42		56
								45		59
								47		41
								54		58
								54		50
								49		50
								51		54
								37		46
								37		55
								68		47
								49		58
								56		42
								48		45
								47		52
								44		37
								45		31
								52		49
								55		31
								52		49.0333
								56		8.26494
								47
								67
								53
								63
								73
								35
								56
								52
								48
								48
								52
								50
								56
								43
								47
								49
								41
								33
								41
								42
								46
								64
								34
								44
								58
								38
								45
								32
								54
								50
								67
								35
								40
								38
								39
								37
								49
								40
								66
								57
								51
								47
								38
								49
								61
								37
								53
								35
								53
								49
								48
								47
								55
								29
								32
								56
								50
								43
								45
								40
								52
								43
								33
								55
								51
								37
								54
								52
								38
								65
								65
								44
								64
								41
								61
								38
								45
								40
								45
								39
								42
								51
								69
								49
								49
								55
								51
								47
								47
								31
								47.8934
								9.41847
