# Supplementary material for: An interpretable deep learning model for detecting BRCA pathogenic variants of breast cancer from hematoxylin and eosin-stained pathological images
Source: PeerJ. 2024 Oct 28;12:e18098. doi: 10.7717/peerj.18098 (PMC11526788; doi:10.7717/peerj.18098)
Supplement: Supplemental Information 2 [file peerj-12-18098-s002.xls]

## Sheet: Sheet1
Subtype
1	Hormone receptor+ (HR+)
2	human epidermal growth factor receptor 2+ Hormone receptor-(HER2+HR-)
3	Triple-negative(TNBC)
Stage
1	I: Tumor (T) Stage: The primary tumor is small, typically less than 2 centimeters in diameter. Node (N) Stage: There is no lymph node involvement or only minimal involvement. Metastasis (M) Stage: No distant metastasis is observed.
2	II: Divided into IIA and IIB: IIA： T Stage: The primary tumor is moderate in size, possibly exceeding 2 centimeters. N Stage: Lymph nodes may have minimal to moderate involvement or none at all. M Stage: No distant metastasis is typically present. IIB： T Stage: The primary tumor may be large, possibly exceeding 5 centimeters. N Stage: Lymph nodes may have minimal involvement or, if the primary tu…
3	III:Divided into IIIA, IIIB, and IIIC: IIIA： T Stage: The primary tumor may be large. N Stage: Lymph nodes may have minimal to moderate involvement. M Stage: Typically, there is no distant metastasis. IIIB： T Stage: The primary tumor may be large and may involve the chest wall or skin. N Stage: Lymph nodes may be involved. M Stage: Typically, there is no distant metastasis. IIIC： T Stage: Can be …
4	IV:T Stage: The primary tumor may be of any size. N Stage: Lymph nodes may or may not be involved. M Stage: Distant metastasis is typically present, such as in bones, lungs, liver, etc.
History
0	No family history of cancer
1	Family history of cancer
ER	ER status (ERstatus is typically established through immunohistochemistry (IHC) testing
0	Negative
1	Positive
PR	PR status (PRstatus is typically established through immunohistochemistry (IHC) testing
0	Negative
1	Positive
HER2	HER2 status (HER 2status is typically established through immunohistochemistry (IHC) testing
0	Negative
1	Positive
